# Supplementary material
Source: PubMed Central journal article supplement (PMC59901)
Supplement: 1472-6947-1-4-S1.pdf [file 1472-6947-1-4-S1.pdf]

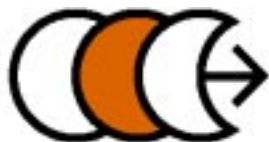

# Centre for Clinical Effectiveness

ENHANCING PATIENT OUTCOMES THROUGH  
CLINICAL APPLICATION OF THE BEST AVAILABLE EVIDENCE

CENTRE USE ONLY

Request No.....

Date received.....

Staff.....

## Evidence Request Form

For staff of the Southern Health Care Network ONLY

Please send completed form to **Centre for Clinical Effectiveness, MMC - Clayton**. Requests for information must relate to SHCN-related work only. Requests will be processed in order.

**Our phone number:**

**9594 2726**

**Our fax number:**

**9594 6970**

**Our website address:**

**<http://www.med.monash.edu.au/publichealth/cce/>**

### Your Details

|                  |             |
|------------------|-------------|
| Name:            | Position:   |
| Dept/Program:    | Campus:     |
| Email Address:   | Work Phone: |
| Date of request: | Work Fax:   |

Please tell us if you wish to publish some of the information we provide because: the SHCN retains copyright over material and we publish completed Evidence Reports on our website.

### Request Details

- The **CLINICAL QUESTION** I would like answered:
  
- The **PURPOSE** to which I wish to put this information:
  
- The **TYPE** of service I require (please tick one only):

|                                                                                                                                    |                                   |
|------------------------------------------------------------------------------------------------------------------------------------|-----------------------------------|
| A. <b>Literature search.</b> Original articles not retrieved. Citations with abstracts if available. Quality of evidence assigned. | 2-4 wks <input type="checkbox"/>  |
| B. <b>Literature search plus critical appraisal.</b> Original articles retrieved.                                                  | 4-8 wks <input type="checkbox"/>  |
| C. <b>Evidence Report.</b> Complete summary of critical appraisal, systematic search strategy, general findings.                   | 8-12 wks <input type="checkbox"/> |

4. The **CONDITION** in which I am interested:

5. The **PATIENTS/CLIENTS** in which I am interested:

- Age range .....

6. The **INTERVENTION/TREATMENT/THERAPY/ EXPOSURE** in which I am interested:

7. **COMPARISON** treatments/interventions/therapy:

8. The **OUTCOME/S** in which I am interested:

9. **CLINICAL ENVIRONMENT**

10. I wish to restrict my search by:

- **Language:** \_\_\_\_\_
- **Year of publication:** \_\_\_\_\_
- **Other requirements?** \_\_\_\_\_

**Thank you for your request.  
You will be contacted soon by a staff member from the Centre.**
