# Supplementary material
Source: PubMed Central journal article supplement (PMC59901)
Supplement: 1472-6947-1-4-S2.pdf [file 1472-6947-1-4-S2.pdf]

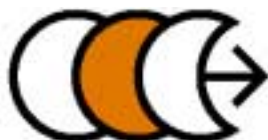

# Centre for Clinical Effectiveness

ENHANCING PATIENT OUTCOMES THROUGH  
CLINICAL APPLICATION OF THE BEST AVAILABLE EVIDENCE

### CENTRE USE ONLY

Request No.....

Date received.....

Staff.....

## Evidence Request Form

For staff of the Southern Health Care Network ONLY

Please send completed form to **Centre for Clinical Effectiveness, MMC - Clayton**. Requests for information must relate to SHCN-related work only. Requests will be processed in order of receipt.

**Our phone number:** 9594 2726      **Our fax number:** 9594 6970

**Our website address:** <http://www.med.monash.edu.au/healthservices/cce/>

### Your Details

|                  |             |
|------------------|-------------|
| Name:            | Position:   |
| Dept/Program:    | Campus:     |
| Email Address:   | Work Phone: |
| Date of request: | Work Fax:   |

**Supplying a well-formulated question will assist us in processing your request with less delay.** Please formulate your question so that each of the following components are clearly defined: (1) the **subjects** to which the answer will apply; (2) the type of **intervention / diagnostic test / prognostic factor** of interest; (3) the type of **comparison or control**; and (4) the **outcomes** of interest. We give you an example below (from Counsell, 1997):

#### A poorly formulated question:

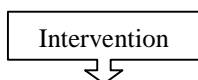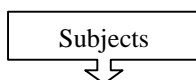

Are anticoagulant agents useful in patients who have had stroke?

#### A well formulated question:

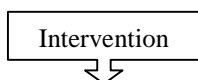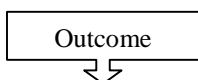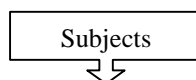

Do anticoagulant agents improve survival in patients with acute ischaemic stroke compared with no treatment?

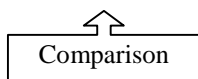

### Request Details

1. The **CLINICAL QUESTION** I would like answered:

2. The **PURPOSE** to which I wish to put this information:

3. The **TYPE** of service I require (please tick **ONE** only):

|                                                                                                                                    |                                   |
|------------------------------------------------------------------------------------------------------------------------------------|-----------------------------------|
| A. <b>Literature search.</b> Original articles not retrieved. Citations with abstracts if available. Quality of evidence assigned. | 2-4 wks <input type="checkbox"/>  |
| B. <b>Literature search plus critical appraisal.</b> Original articles retrieved.                                                  | 4-8 wks <input type="checkbox"/>  |
| C. <b>Evidence Report.</b> Complete summary of critical appraisal, systematic search strategy, general findings.                   | 8-12 wks <input type="checkbox"/> |

4. The **CONDITION** in which I am interested:

5. The **PATIENTS / SUBJECTS** in which I am interested:

- Age range .....

6. The **INTERVENTION / DIAGNOSTIC TEST / PROGNOSTIC FACTOR** in which I am interested:

7. **COMPARISON OR CONTROL** treatment / intervention / test:

8. The **OUTCOMES** in which I am interested:

9. The **CLINICAL ENVIRONMENT** to which these findings will apply:

10. I wish to **RESTRICT** the search to the following years of publication: \_\_\_\_\_ to \_\_\_\_\_

---

Please note the following:

- The Southern Health Care Network retains copyright over the information we provide. Please contact us if you wish to publish material contained in a report.
- Completed Evidence Centre Critical Appraisals and Reports are available in full on our website.

**Thank you for your request.**  
**You will be contacted soon by a staff member from the Centre.**
